# Supplementary material
Source: Springer Nature journal article supplement (https://www.springermedizin.de/resource/supplementary/12936_2010_1298_MOESM3_ESM.pdf/9549438)

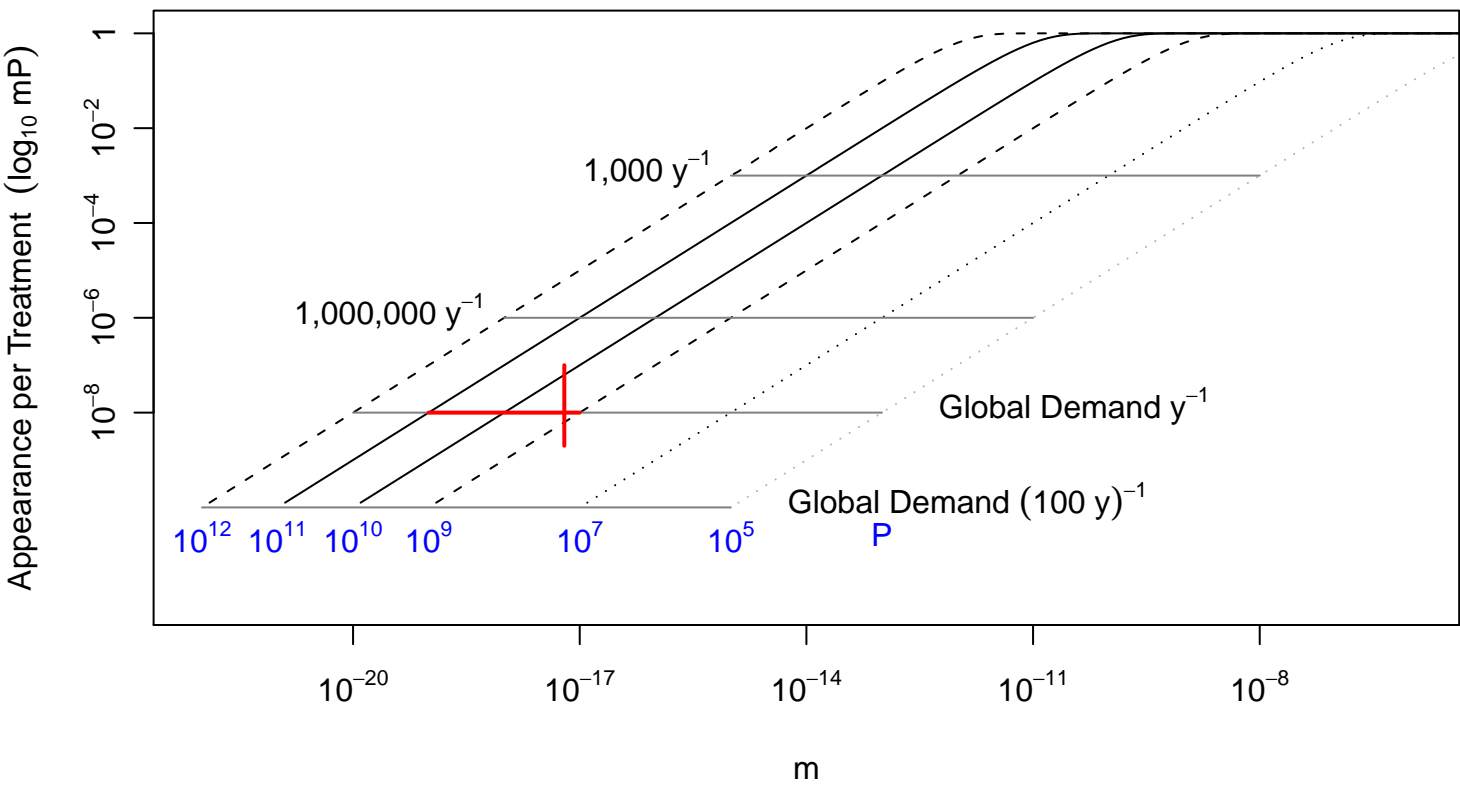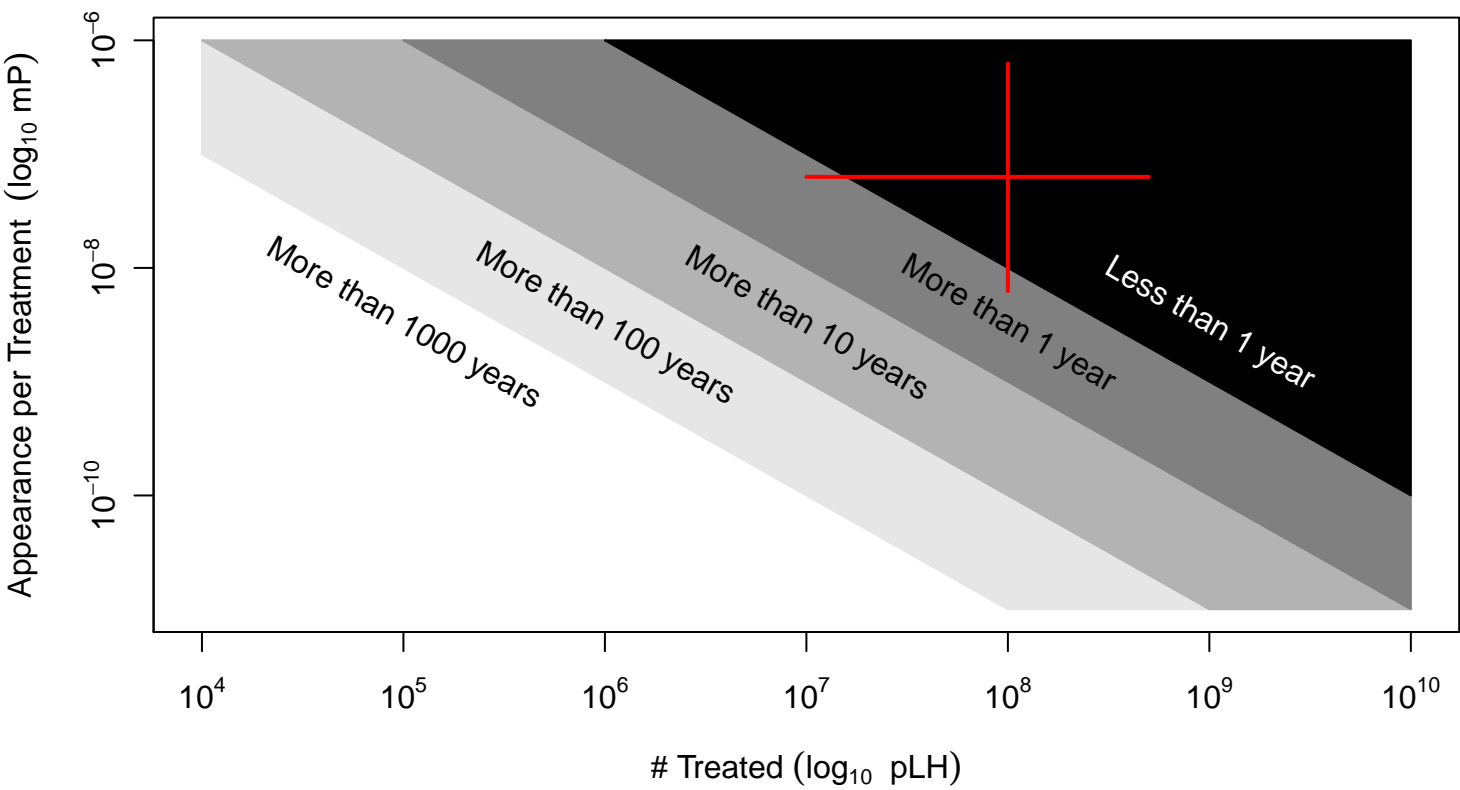

Supplement: MOESM3 [file 9549438]
